# Supplementary material
Source: PubMed Central journal article supplement (PMC4081335)
Supplement: supp_pp.114.239699_239699Supplemental_Figures.pdf [file supp_pp.114.239699_239699Supplemental_Figures.pdf]

## Supplemental Figures

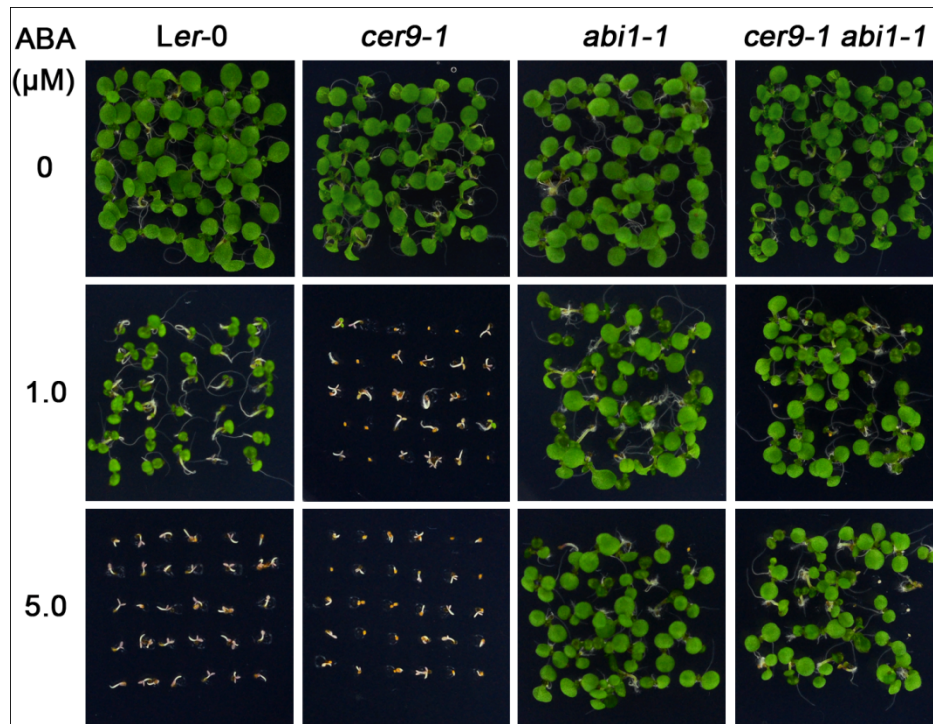

**Figure S1.** Sensitivity of the *cer9-1 abi1-1* double mutant to ABA.

*Ler-0* (wild type), *cer9-1*, *abi1-1* and *cer9-1 abi1-1* seeds were sown onto  $\frac{1}{2}$  MS agar medium supplemented with 0, 1.0, or 5.0  $\mu$ M ABA. Representative pictures show the morphology of seedlings 7 days after being sown on the medium plates.

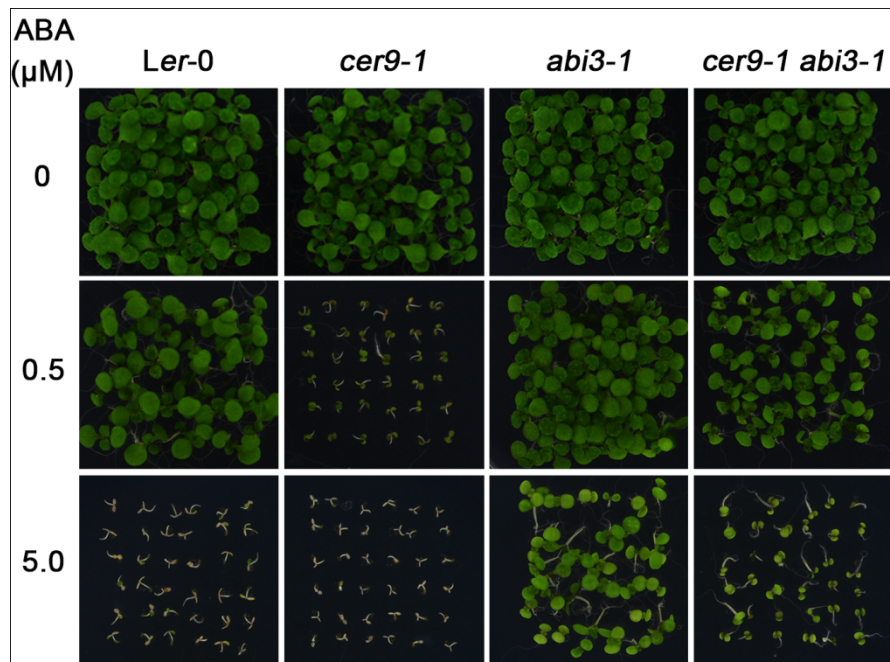

**Figure S2.** Sensitivity of the *cer9-1 abi3-1* double mutant to ABA.

*Ler-0* (wild type), *cer9-1*, *abi3-1* and *cer9-1 abi3-1* seeds were sown onto  $\frac{1}{2}$  MS agar medium supplemented with 0, 0.5, or 5.0  $\mu\text{M}$  ABA. Representative pictures show the morphology of seedlings 7 days after being sown on the medium plates.

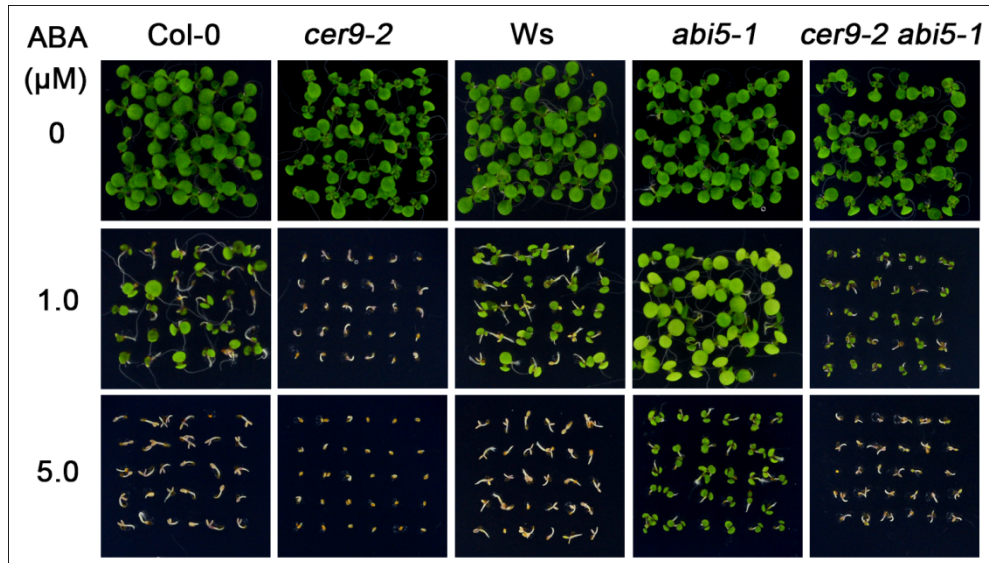

**Figure S3.** Sensitivity of the *cer9-2 abi5-1* double mutant to ABA.

Col-0 (wild type), Ws (wild type), *cer9-2*, *abi5-1* and *cer9-2 abi5-1* seeds were sown onto  $\frac{1}{2}$  MS agar medium supplemented with 0, 1.0, or 5.0  $\mu\text{M}$  ABA. Representative pictures show the morphology of seedlings 7 days after being sown on the medium plates.

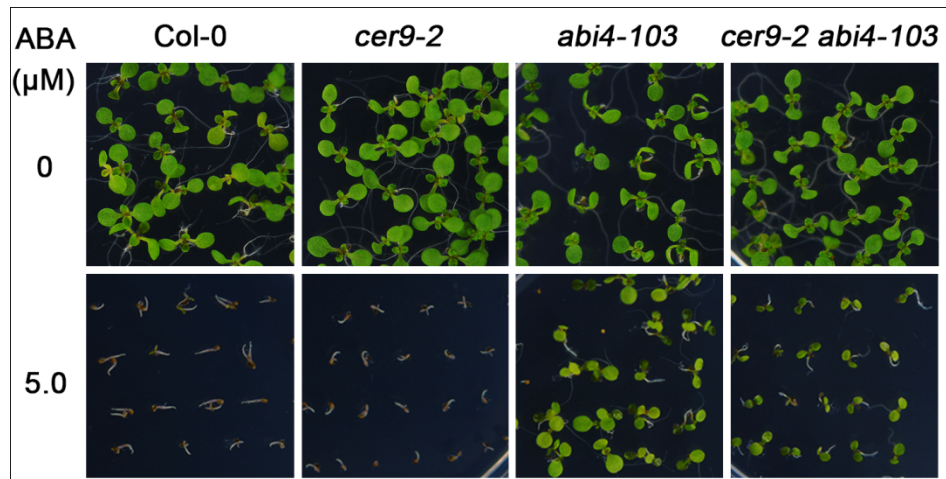

**Figure S4.** Sensitivity of the *cer9-2 abi4-103* double mutant to ABA.

Col-0 (wild type), *cer9-2*, *abi4-103* and *cer9-2 abi4-103* seeds were sown onto  $\frac{1}{2}$  MS medium supplemented with 0 or 5.0  $\mu\text{M}$  ABA. Representative pictures showed the morphology of seedlings 7 days after being sown on the media plates.
